# Supplementary material
Source: PubMed Central journal article supplement (PMC9020433)
Supplement: NIHMS1740520-supplement-1.pdf [file NIHMS1740520-supplement-1.pdf]

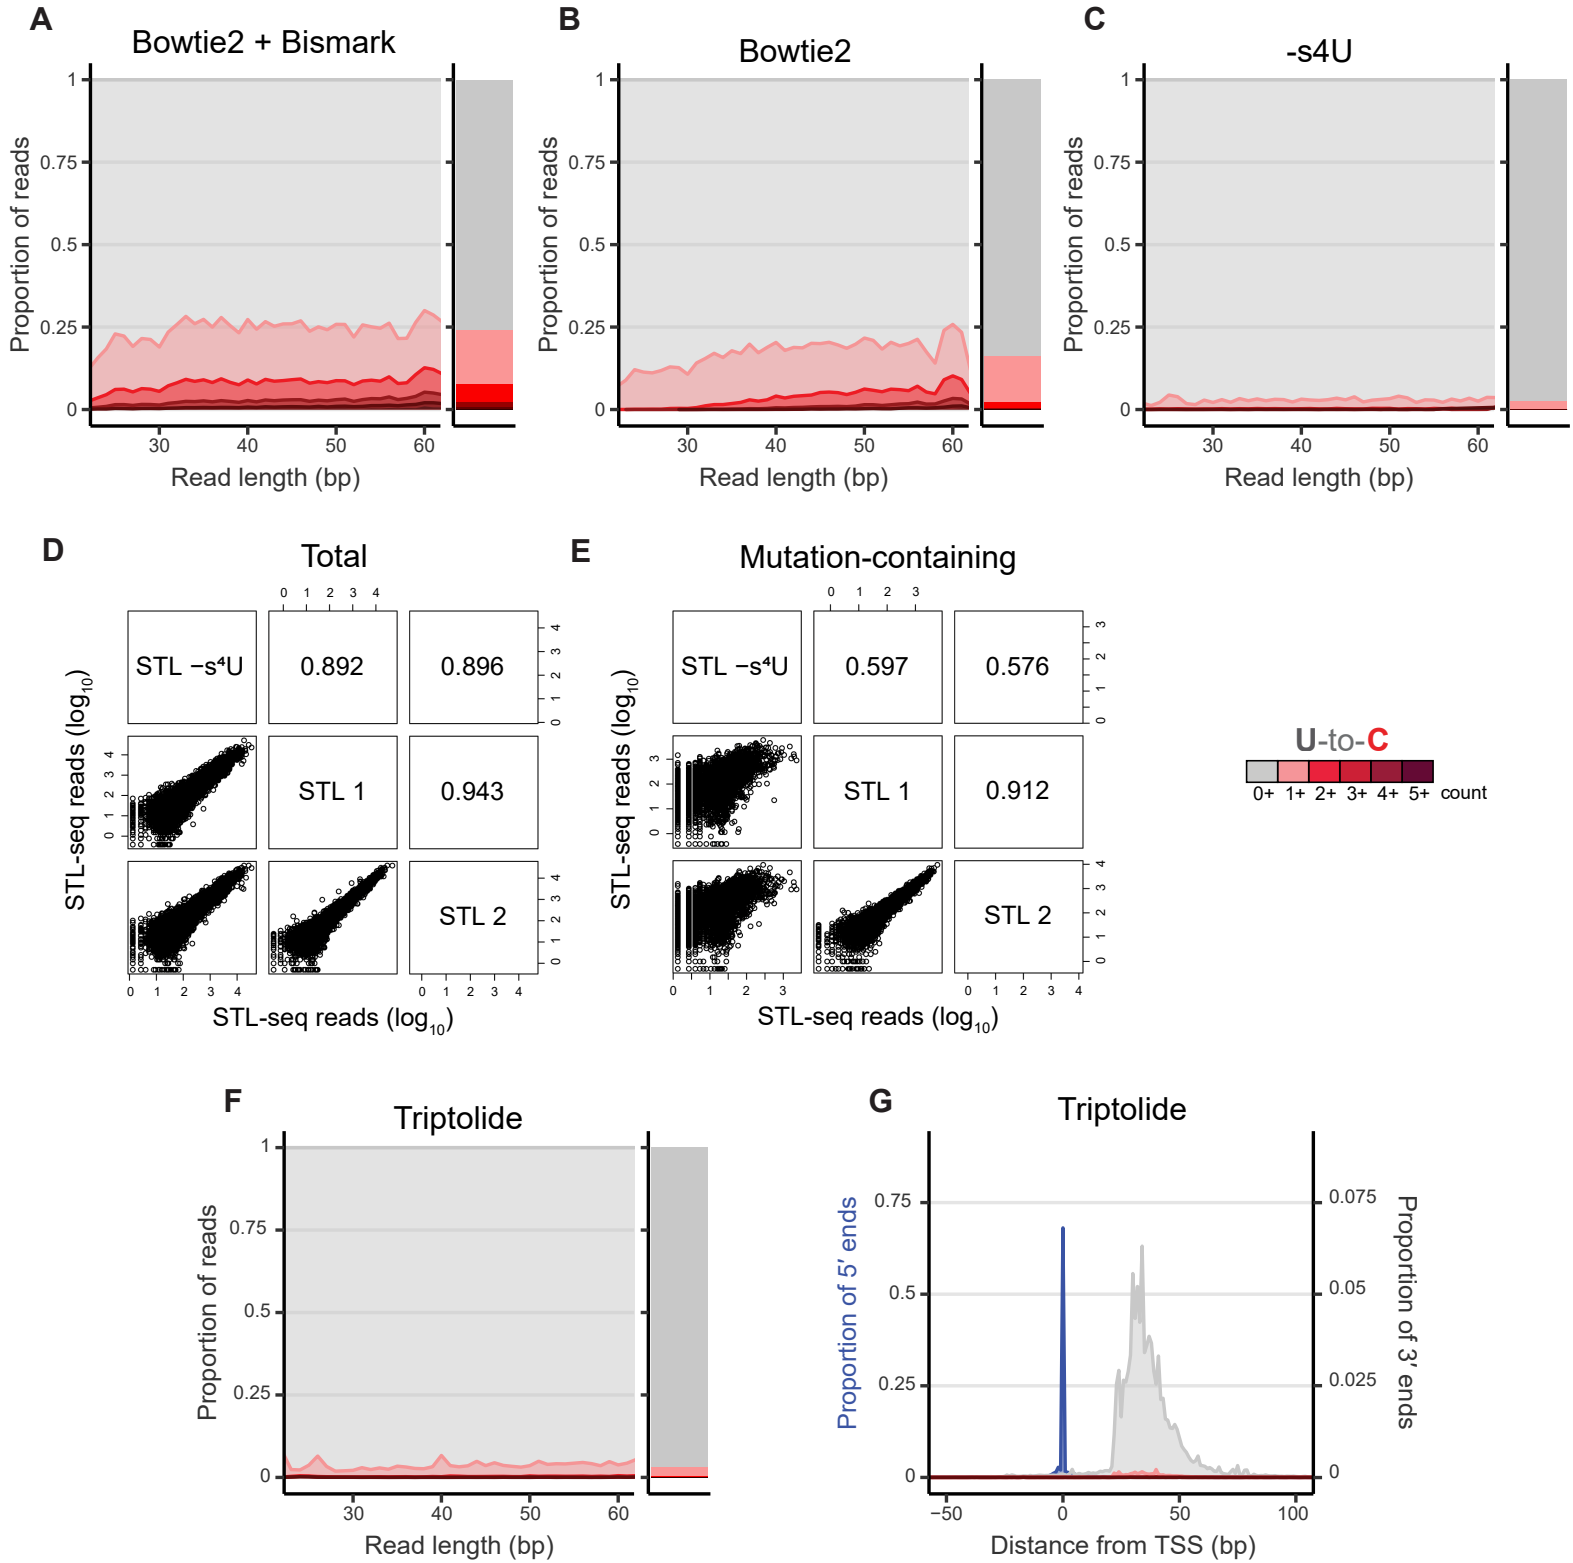

**Figure S1.**

**Figure S1. STL-seq captures mutation information of newly synthesized short, capped transcripts, Related to Figure 1**

(A, B, & C) The proportion of reads with varying numbers of mutations at each length. Reads are considered by absolute length, and each mutation level includes reads with the same or greater number of mutations. Reads were aligned with Bowtie2 combined with Bismark (A & C) or Bowtie2 alone (B) and either labeled (A & B) or unlabeled (C) with s<sup>4</sup>U. The total proportion of reads is colored by number of mutations and shown on the right.

(D) Pairs plots of total TSS read counts from STL-seq unlabeled and labeled samples. Read counts are plotted on the log<sub>10</sub> scale and the Pearson correlation coefficient of each comparison is shown.

(E) Pairs plots of mutation-containing TSS read counts from STL-seq unlabeled and labeled samples. Read counts are plotted on the log<sub>10</sub> scale and the Pearson correlation coefficient of each comparison is shown.

(F) Same as A-C but labeled under triptolide inhibition and aligned with Bismark.

(G) Metaplot of STL-seq read ends relative to the TSS location under triptolide inhibition. The single nucleotide location of the TSS (blue, 5' end of read) and pausing position (grey and red, 3' end of read) are depicted separately. The 3' ends are colored by the read's mutational content while the 5' ends are not. Read ends at each distance from the TSS for the labeled samples are shown as a proportion of the total number of reads. The proportion of 5' ends corresponds to the left y-axis scale and the proportion of 3' ends corresponds to the right y-axis scale.

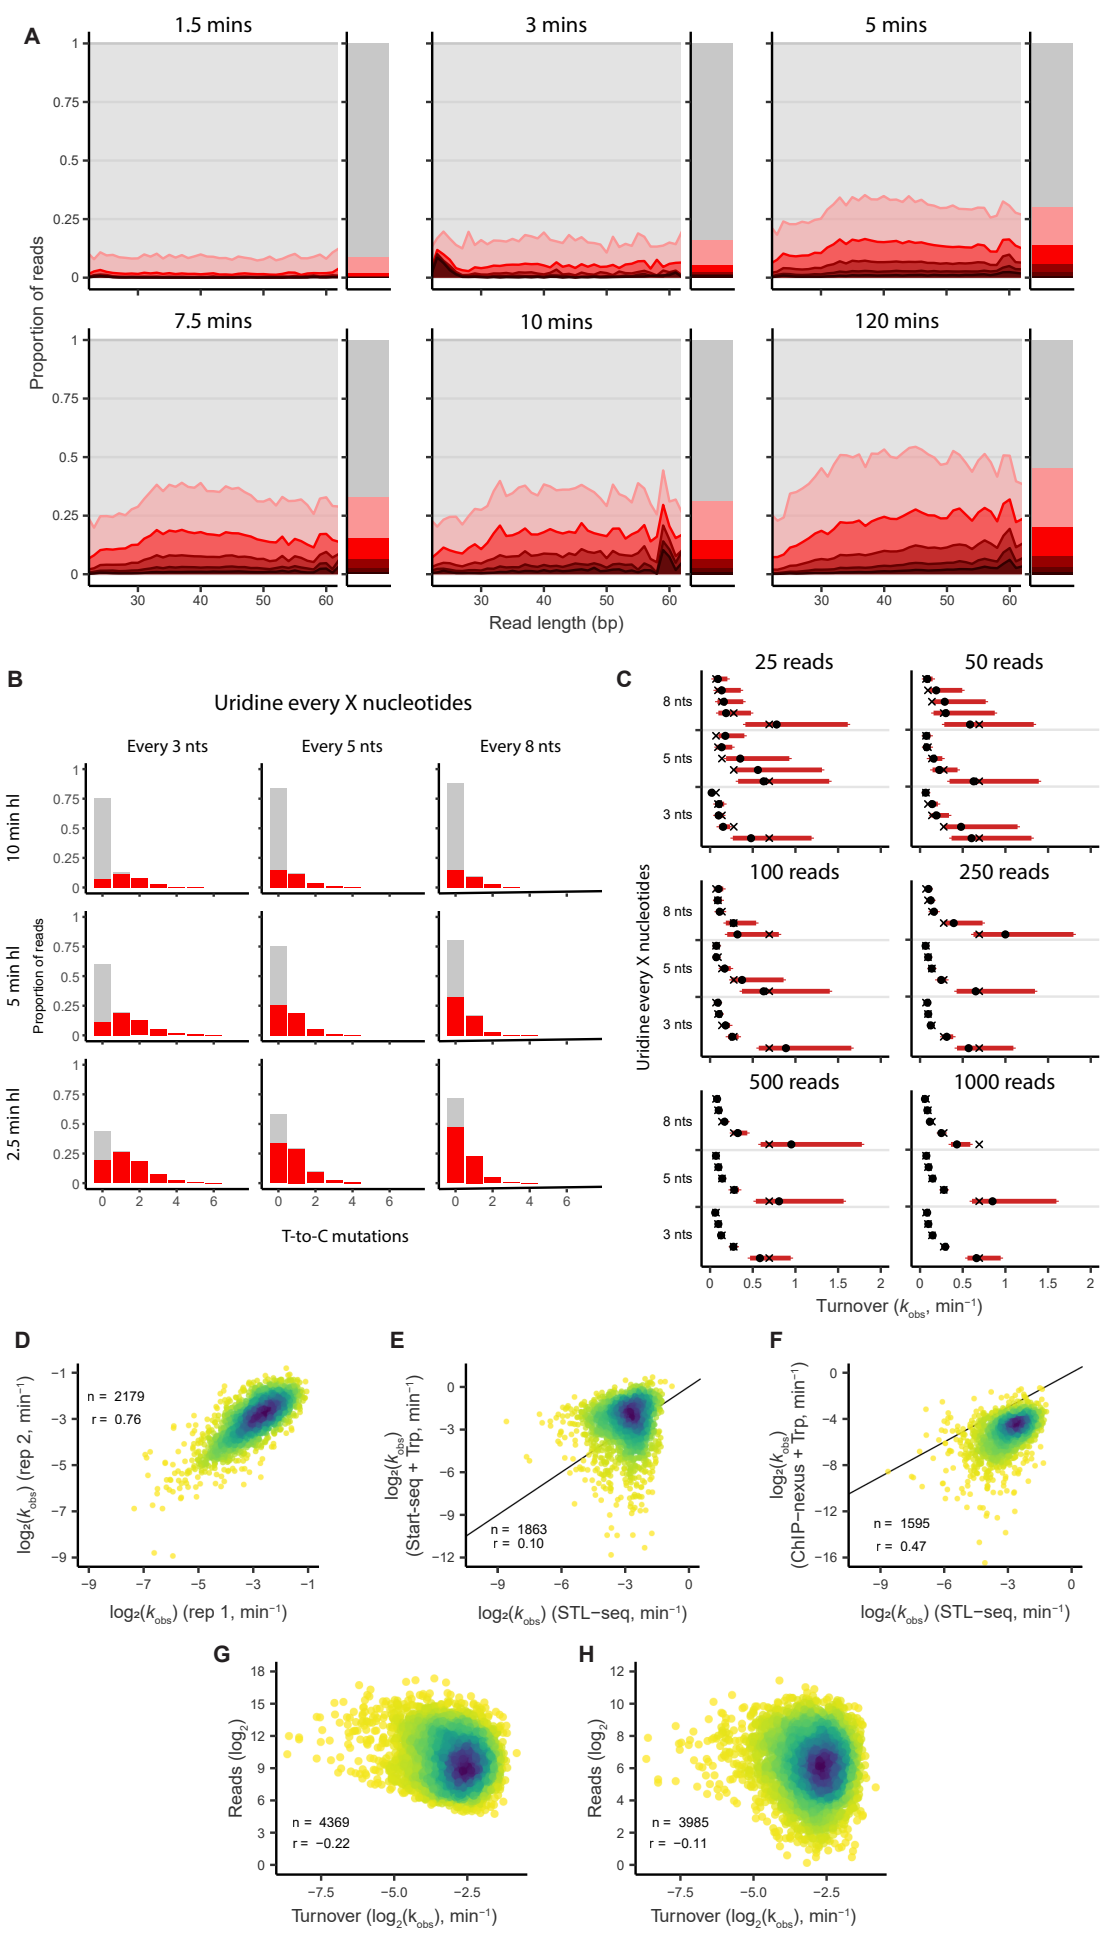

Figure S2.

## Figure S2. Binomial modeling of STL-seq mutation data, Related to Figure 2

(A) The proportion of reads with varying numbers of mutations at each length when labeled for varying times with  $s^4U$ . Reads are considered by absolute length and each mutation level includes reads with the same or greater number of mutations. The total proportion of reads is colored by number of mutations and shown on the right of the plot for each label time.

(B) Simulated STL-seq mutational content of TSSs with various pausing half-lives (hl) and uridine content. Reads are colored by whether they are considered new (red) and synthesized during the label time or old (grey) and synthesized prior to labeling. See STAR methods for details of simulated data.

(C) Using the model to estimate the rate constant of simulated data generated as in B in addition to varying degrees of coverage. The true rate constant is indicated with a cross. The median value of the posterior estimate is indicated with a solid circle and the 80% credible interval is indicated by red bars. See STAR methods for details of simulated data.

(D) Correlation plot comparing estimates from single STL-seq replicates. Plotted points represent the median value of the posterior estimate. The density of plotted points is indicated by color (blue, high; yellow, low). The Pearson correlation coefficient is shown.

(E) Correlation plot comparing  $\hat{k}_{obs}$  estimates made with STL-seq and previously published Start-seq data under Trp inhibition. The median value of the STL-seq posterior estimate is plotted and the 1:1 line is shown. The density of plotted points is indicated by color (blue, high; yellow, low). The Pearson correlation coefficient is shown.

(F) Correlation plot comparing  $\hat{k}_{obs}$  estimates made with STL-seq and previously published ChIP-nexus data under Trp inhibition. The median value of the STL-seq posterior estimate is plotted and the 1:1 line is shown. The density of plotted points is indicated by color (blue, high; yellow, low). The Pearson correlation coefficient is shown.

(G) Correlation plot comparing STL-seq  $\hat{k}_{obs}$  estimates and STL-seq read counts at each TSS. The median value of the STL-seq posterior estimate is plotted. The density of plotted points is indicated by color (blue, high; yellow, low). The Pearson correlation coefficient is shown.

(H) As in G but comparing STL-seq  $\hat{k}_{obs}$  estimates and PRO-seq read counts in the promoter-proximal region of each TSS.

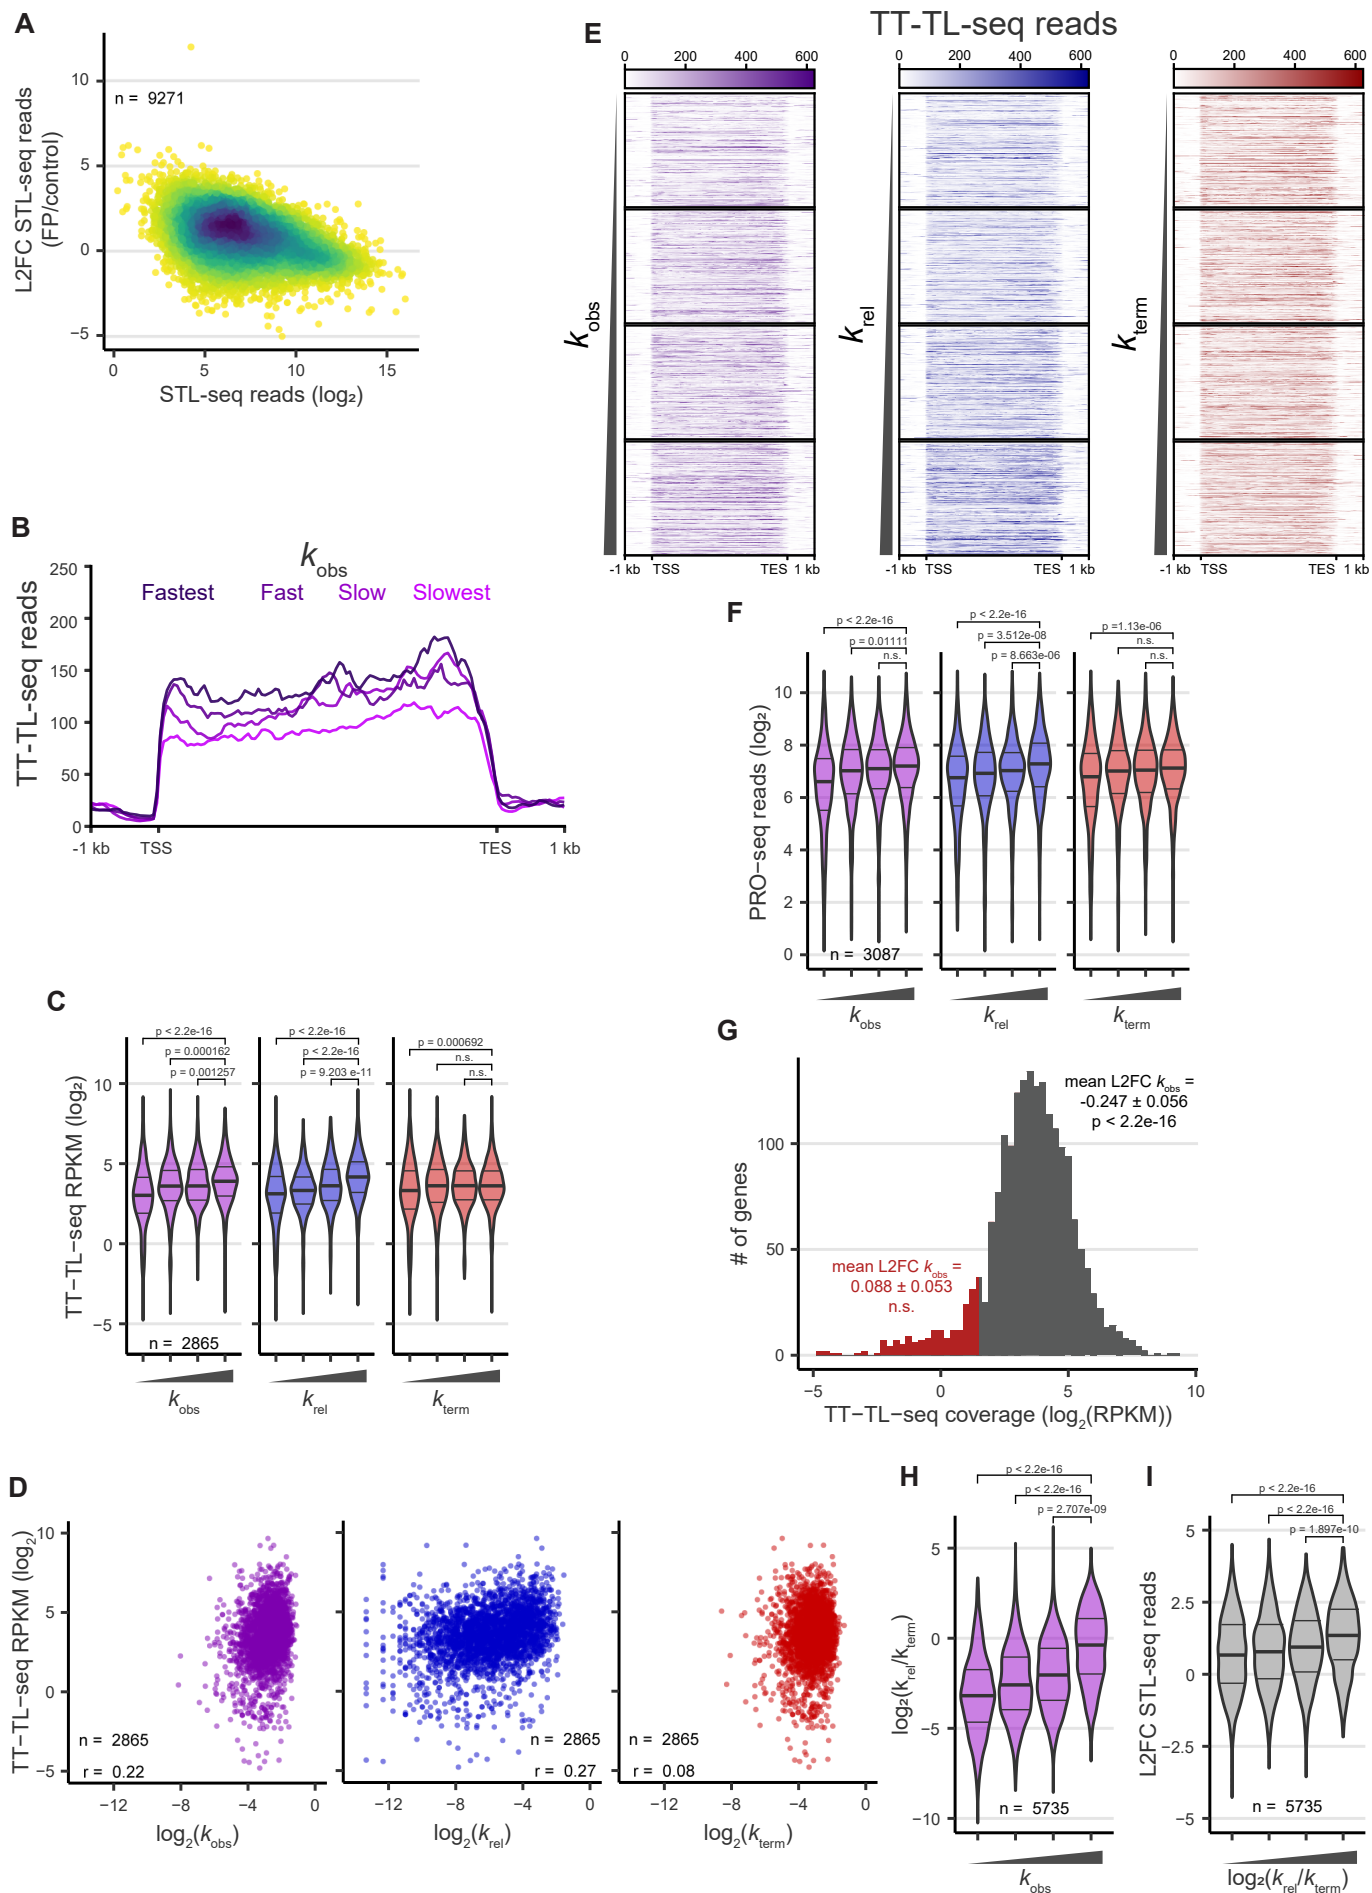

**Figure S3.**

**Figure S3. Release from the pause site predicts downstream transcriptional activity, Related to Figure 3**

(A) The change in normalized STL-seq reads at all TSS upon flavopiridol inhibition plotted versus the average normalized STL-seq read count in untreated controls. The density of plotted points is indicated by color (blue, high; yellow, low).

(B) Metaplots of TT-TL-seq signal grouped into even quartiles by total observed turnover of the respective TSS. Coverage is determined over 50 nt bins.

(C) The distribution of TT-TL-seq coverage over the entire gene body by RPKM. Genes are grouped into even quartiles by total observed turnover, release, or termination of the respective TSS. Significance was assessed by a two-sided Wilcoxon rank sum test.

(D) Correlation plot comparing  $\hat{k}_{\text{obs}}$ ,  $\hat{k}_{\text{rel}}$ , or  $\hat{k}_{\text{term}}$  estimates made with STL-seq and TT-TL-seq coverage in RPKM. The median value of the STL-seq posterior estimate is plotted. The Pearson correlation coefficient is shown.

(E) Heat maps of TT-TL-seq data grouped as in C and ordered by the indicated rate constant.

(F) The distribution of PRO-seq (Elrod et al., 2019) reads over the region from 0.5 kb to 1.5 kb downstream of the TSS. Genes are grouped into even quartiles by total observed turnover, release, or termination of the respective TSS. Significance was assessed by a two-sided Wilcoxon rank sum test.

(G) Histogram of RPKM values for genes in TT-TL-seq data. The red highlighted region represents the 10% of genes with the least coverage. The mean  $\log_2$  fold change of  $\hat{k}_{\text{obs}}$  upon FP treatment and standard error are shown for TSSs of the bottom 10% of genes (red) or the entire genome (black). Statistical difference from zero was assessed with a one-sample Wilcoxon signed rank test.

(H) The distribution of the  $\log_2$  ratio of the release rate to termination rate at all TSSs grouped into even quartiles by the total observed turnover. Significance was assessed by a two-sided Wilcoxon rank sum test.

(I) The distribution of the  $\log_2$  fold change in normalized STL-seq read counts upon flavopiridol inhibition at all TSSs grouped into even quartiles by the  $\log_2$  ratio of the release rate to termination rate. Significance was assessed by a two-sided Wilcoxon rank sum test.

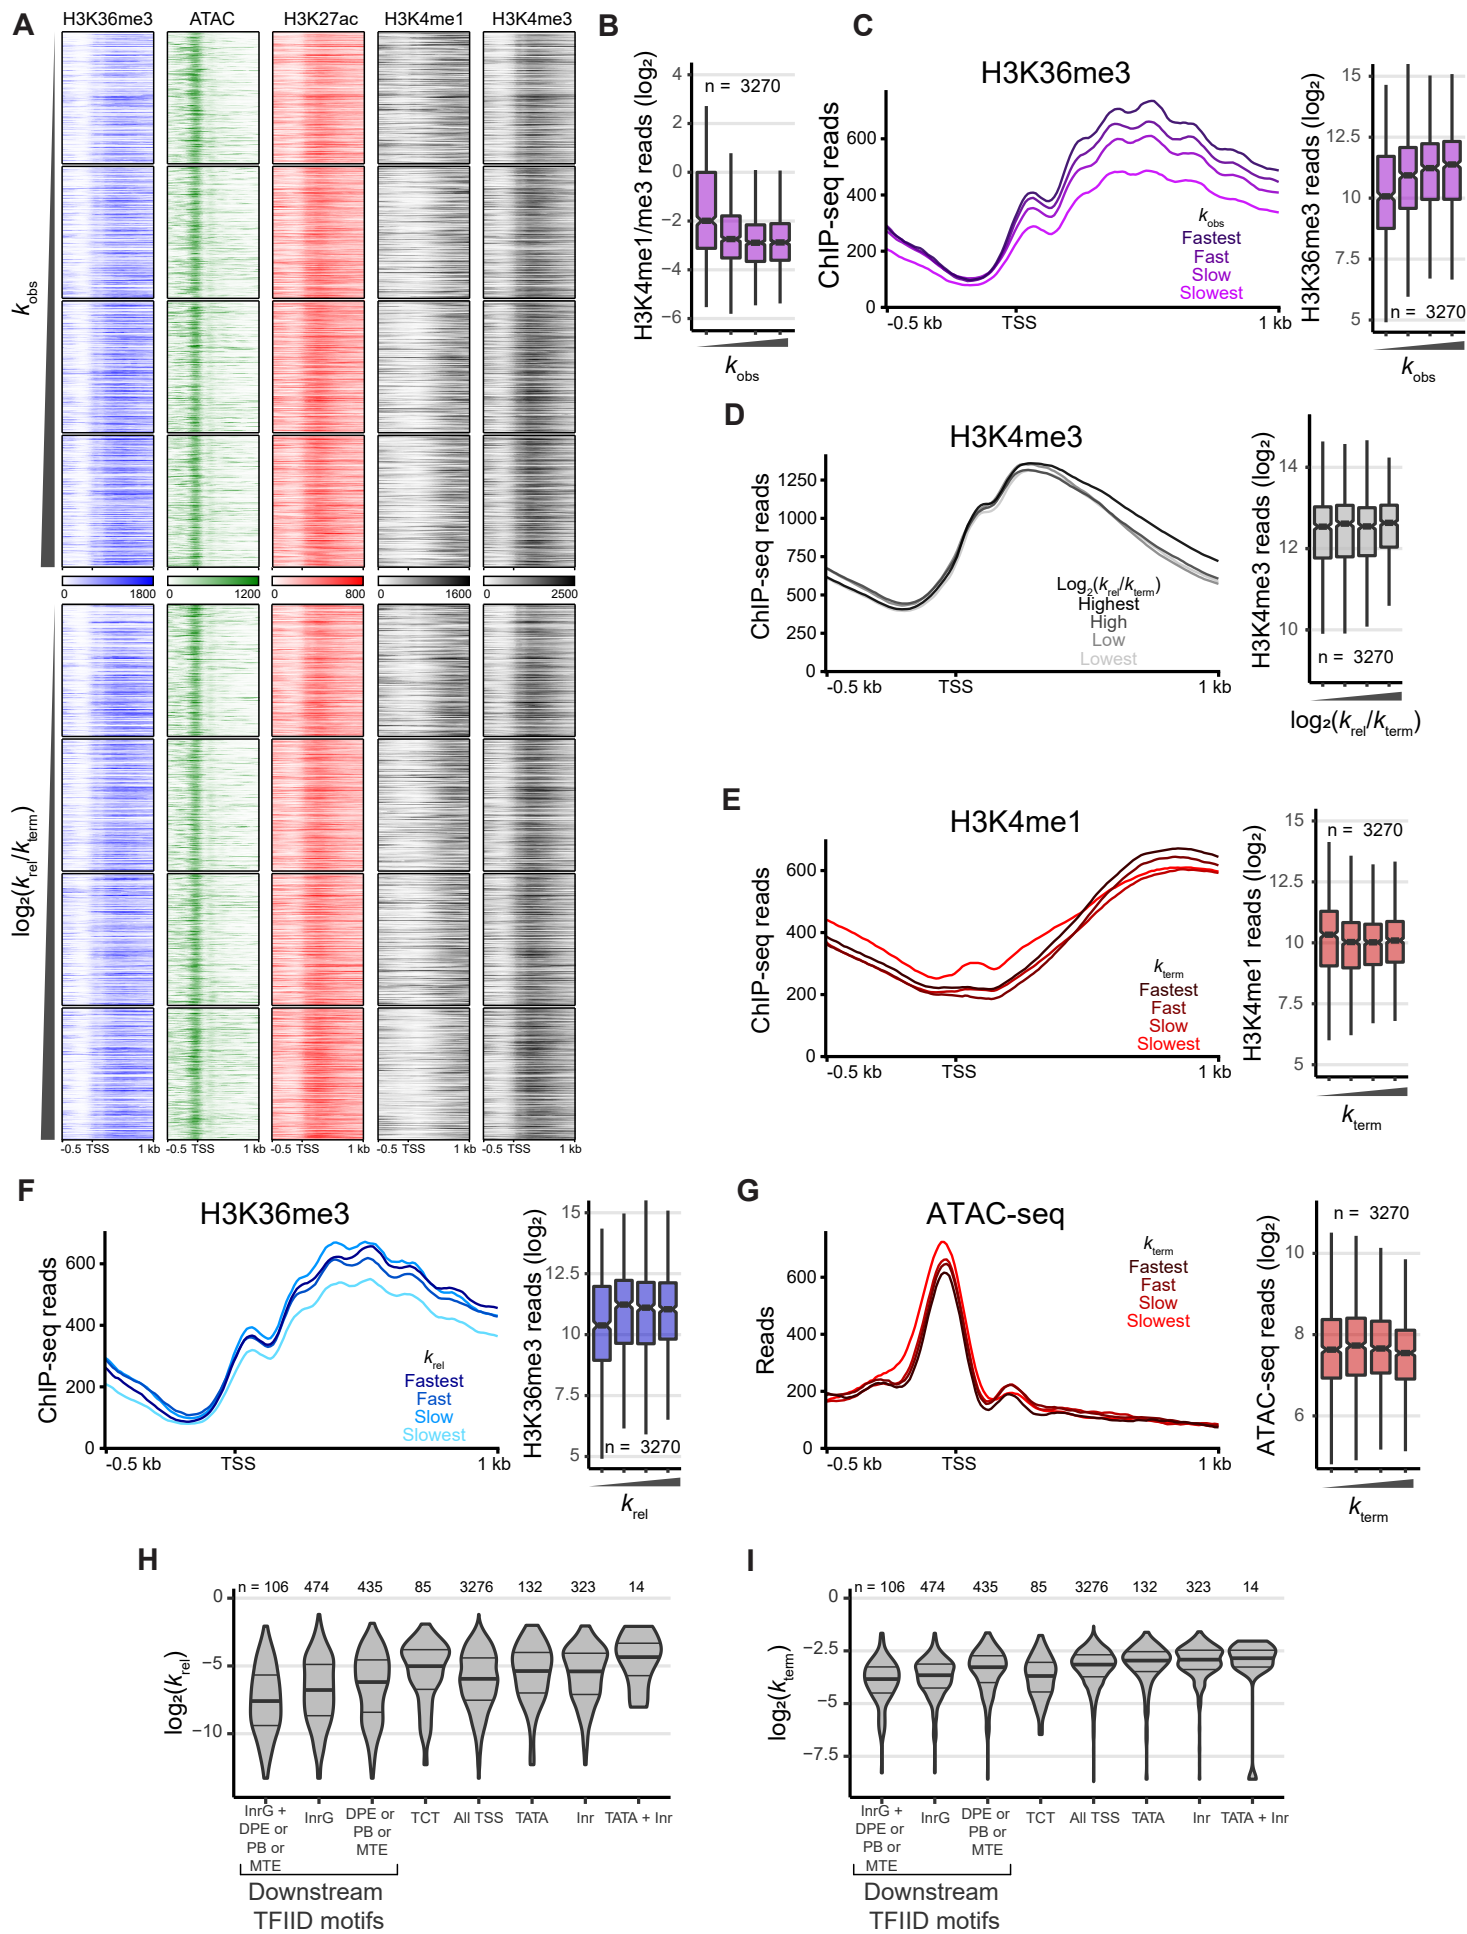

Figure S4.

**Figure S4. Chromatin structure defines unique profiles of pausing kinetics, Related to Figure 4**

(A) Heat maps of ATAC-seq (Elrod et al., 2019) and ChIP-seq H3K27ac, H3K4me1, H3K4me3 (Henriques et al., 2018), and H3K36me3 (Chen et al., 2012) around promoters grouped into even quartiles and ordered by total turnover or  $\log_2$  ratio of the release rate to the termination rate of the respective TSS. Heatmaps are centered on the STL-seq TSS with a window of 0.5 kb upstream and 1 kb downstream.

(B) The  $\log_2$  ratio of H3K4me1 to H3K4me3 ChIP-seq reads in the window 0.5 kb upstream and 1 kb downstream of the promoter TSS, grouped into even quartiles by total turnover ( $n = 3270$  promoters). Significance was assessed by a two-sided Wilcoxon rank sum test.

(C) Metaplot (left) and read count distribution (right) of H3K36me3 ChIP-seq data around promoters with a window of 0.5 kb upstream and 1 kb downstream of the TSS, grouped into even quartiles by total turnover.

(D) Metaplot (left) and read count distribution (right) of H3K4me3 ChIP-seq data around promoters with a window of 0.5 kb upstream and 1 kb downstream of the TSS, grouped into even quartiles by the  $\log_2$  ratio of the release rate to the termination rate.

(E) Metaplot (left) and read count distribution (right) of H3K4me1 ChIP-seq data around promoters with a window of 0.5 kb upstream and 1 kb downstream of the TSS, grouped into even quartiles by termination.

(F) Same as C but grouped into even quartiles by pause release.

(G) Metaplot (left) and read count distribution (right) of ATAC-seq data around promoters with a window of 0.5 kb upstream and 1 kb downstream of the TSS grouped into even quartiles by termination.

(H and I) The distribution of the release rate (H) or termination rate constants (I) at promoters grouped by motif content. The pause button (PB), downstream promoter element (DPE), and motif ten element (MTE) were grouped together such that promoters may have one or a combination of these in the downstream region.



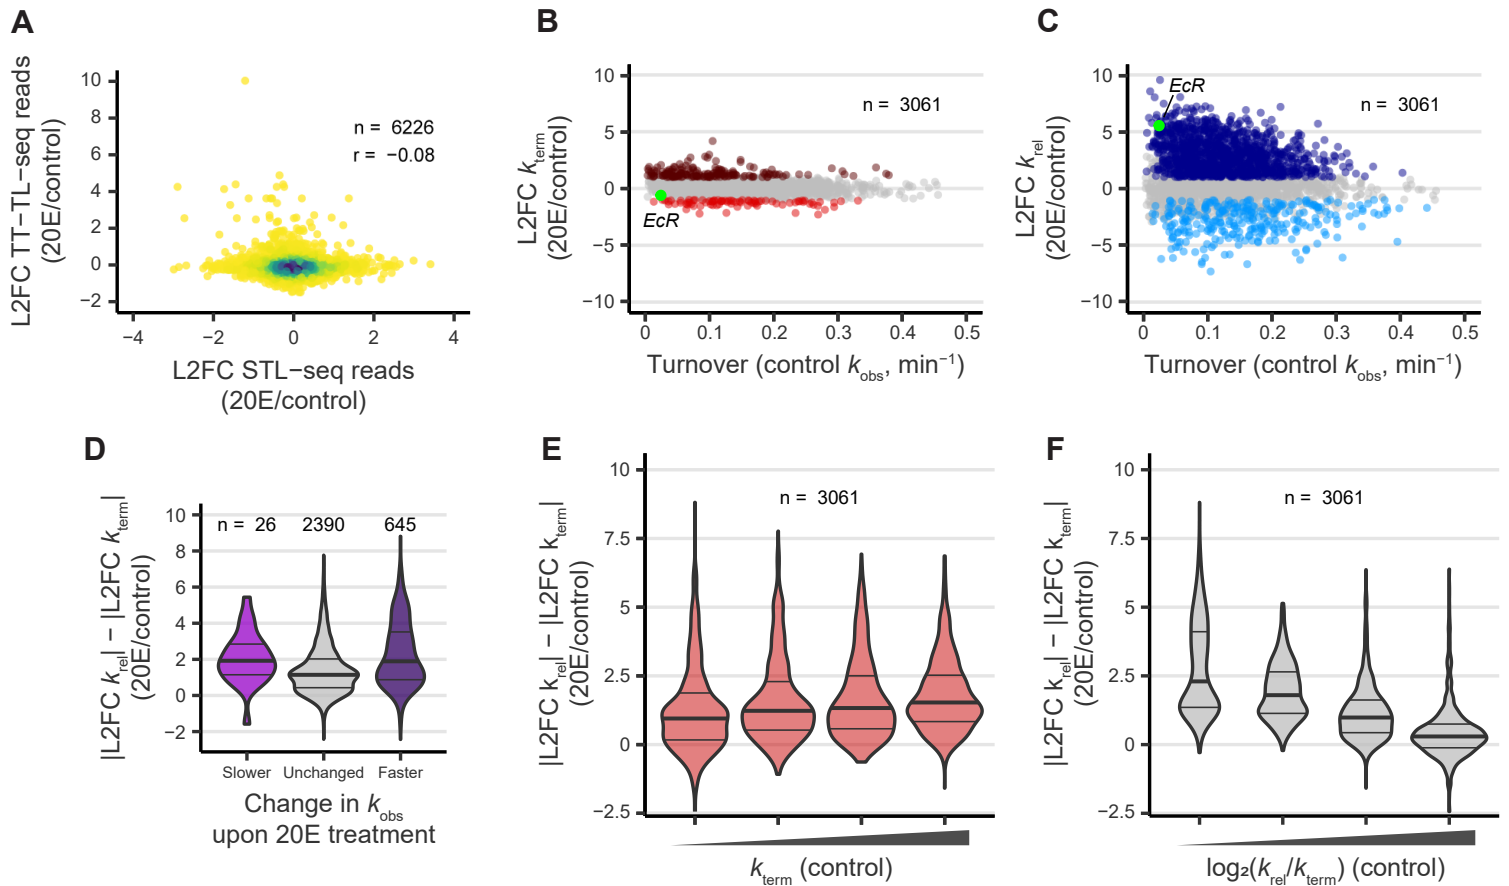

**Figure S5.**

**Figure S5. Termination is rarely regulated in response to hormone stimulus, Related to Figure 5**

(A) The  $\log_2$  fold change in normalized STL-seq reads at all TSS upon 20E treatment versus the  $\log_2$  fold change in normalized TT-TL-seq read counts of the associated gene upon hormonal treatment. The density of plotted points is indicated by color (blue, high; yellow, low). The Pearson correlation coefficient is shown.

(B and C) The total observed turnover rate constants plotted versus the  $\log_2$  fold change in termination (B) or release (C) upon 20E stimulus. Points are colored if the 80% credible interval of the  $\log_2$  fold change does not overlap zero and the median value is greater than 1 (dark red/blue) or less than -1 (light red/blue).

(D) The difference between the magnitudes of the  $\log_2$  fold change of release and termination grouped by the change in the total turnover as determined in Figure 6B.

(E) The difference between the magnitudes of the  $\log_2$  fold change of release and termination grouped by the change into even quartiles by termination.

(F) The difference between the magnitudes of the  $\log_2$  fold change of release and termination grouped by the change into even quartiles by the  $\log_2$  ratio of the release rate to the termination rate.

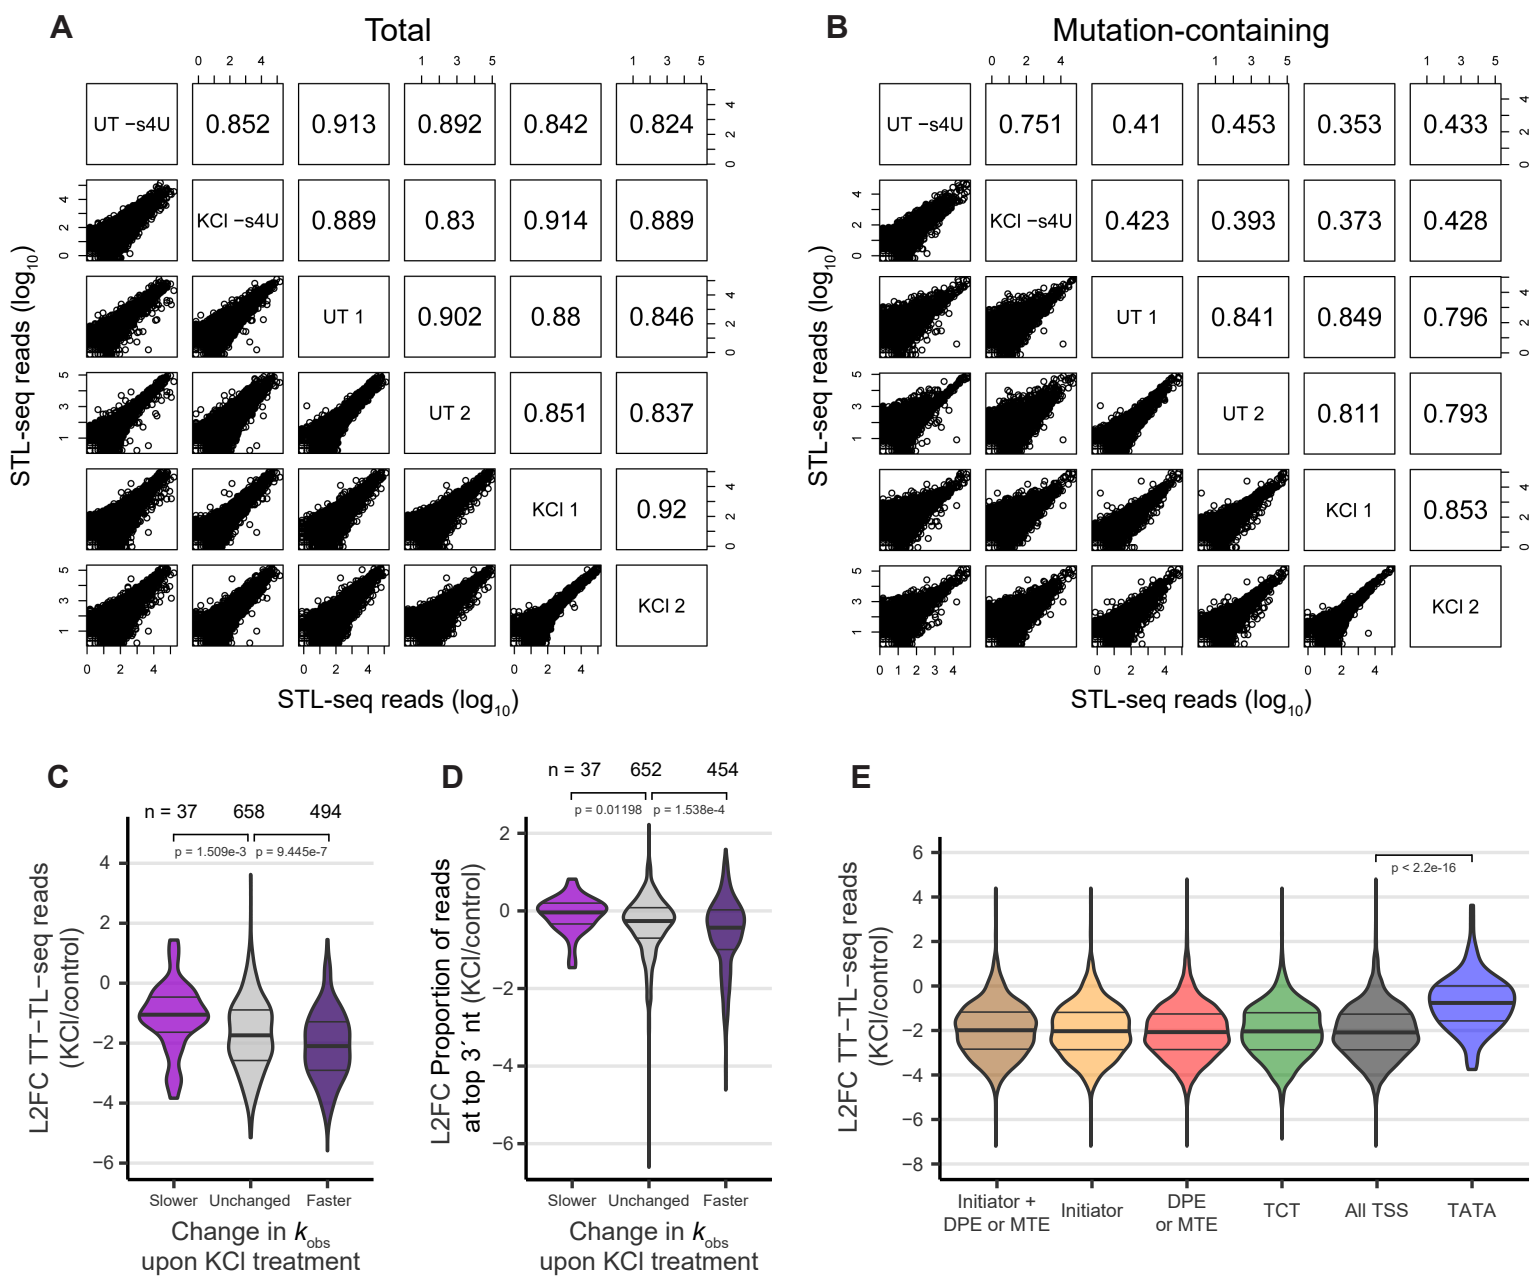

**Figure S6.**

**Figure S6. Increased termination at the pause site causes widespread transcriptional repression upon hyperosmotic stress in human cells, Related to Figure 6**

(A) Pairs plots of total TSS read counts from STL-seq unlabeled and labeled samples under normal and hyperosmotic stress conditions. Read counts are plotted on the  $\log_{10}$  scale and the Pearson correlation coefficient of each comparison is shown.

(B) Pairs plots of mutation-containing TSS read counts from STL-seq unlabeled and labeled samples under normal and hyperosmotic stress conditions. Read counts are plotted on the  $\log_{10}$  scale and the Pearson correlation coefficient of each comparison is shown.

(C) Distribution of the  $\log_2$  fold change of TT-TL-seq signal upon hyperosmotic stress grouped by the change in turnover of the TSS called to each gene. Significance was assessed by a two-sided Wilcoxon rank sum test.

(D) Distribution of the  $\log_2$  fold change of the proportion of reads with 3' ends located at the most frequent pause position grouped by the change in turnover of the scRNA. At each promoter, the most common position of the 3' read end is identified, and all reads are considered by their 3' end relative to the most common. The change in the proportion of reads at the most common position upon hyperosmotic stress is plotted.

(E) Distribution of the  $\log_2$  fold change of TT-TL-seq signal upon hyperosmotic stress grouped by the motif content of the associated STL-seq TSS. Significance was assessed by a two-sided Wilcoxon rank sum test.

**Table S1.** STL-seq oligos used in this study. Related to STAR methods.

| Name                                | Oligo                                                                  |
|-------------------------------------|------------------------------------------------------------------------|
| STL-seq custom 3' DNA adapter       | rAppGATCGGAAGAGCACACGTCTG /3'SPACER C3/                                |
| STL-seq custom 5' RNA adapter       | rUrArCrArCrGrArCrGrCrUrCrUrUrCrCrGrArUrCrUrCrGrArUrC                   |
| STL-seq custom RT primer            | CAGACGTGTGCTCTTCC                                                      |
| STL-seq custom 5' indexing primer 1 | AATGATACGGCGACCACCGAGATCTACACTATAGCCTACACTCTTTCCCTACACGACGCTCTTCCGATCT |
| STL-seq custom 5' indexing primer 2 | AATGATACGGCGACCACCGAGATCTACACATAGAGGCACACTCTTTCCCTACACGACGCTCTTCCGATCT |
| STL-seq custom 5' indexing primer 3 | AATGATACGGCGACCACCGAGATCTACACCCTATCCTACACTCTTTCCCTACACGACGCTCTTCCGATCT |
| STL-seq custom 5' indexing primer 4 | AATGATACGGCGACCACCGAGATCTACACGGCTCTGAACACTCTTTCCCTACACGACGCTCTTCCGATCT |
| STL-seq custom 5' indexing primer 5 | AATGATACGGCGACCACCGAGATCTACACAGGCGAAGACACTCTTTCCCTACACGACGCTCTTCCGATCT |
| STL-seq custom 5' indexing primer 6 | AATGATACGGCGACCACCGAGATCTACACTAATCTTAACTCTTTCCCTACACGACGCTCTTCCGATCT   |
| STL-seq custom 5' indexing primer 7 | AATGATACGGCGACCACCGAGATCTACACCAGGACGTACACTCTTTCCCTACACGACGCTCTTCCGATCT |
| STL-seq custom 5' indexing primer 8 | AATGATACGGCGACCACCGAGATCTACACGTACTGACACACTCTTTCCCTACACGACGCTCTTCCGATCT |
| STL-seq custom 3' indexing primer 1 | CAAGCAGAAGACGGCATAACGAGATCGAGTAATGTGACTGGA GTTCAGACGTGTGCTCTTCCGATC    |
| STL-seq custom 3' indexing primer 2 | CAAGCAGAAGACGGCATAACGAGATCTCCGGAGTGACTGGAG TTCAGACGTGTGCTCTTCCGATC     |
| STL-seq custom 3' indexing primer 3 | CAAGCAGAAGACGGCATAACGAGATAATGAGCGGTGACTGGA GTTCAGACGTGTGCTCTTCCGATC    |
| STL-seq custom 3' indexing primer 4 | CAAGCAGAAGACGGCATAACGAGATGGAATCTCGTGACTGGA GTTCAGACGTGTGCTCTTCCGATC    |
| STL-seq custom 3' indexing primer 5 | CAAGCAGAAGACGGCATAACGAGATTTCTGAATGTGACTGGA GTTCAGACGTGTGCTCTTCCGATC    |
| STL-seq custom 3' indexing primer 6 | CAAGCAGAAGACGGCATAACGAGATACGAATTCGTGACTGGA GTTCAGACGTGTGCTCTTCCGATC    |
| STL-seq custom 3' indexing primer 7 | CAAGCAGAAGACGGCATAACGAGATAGCTTCAGGTGACTGGA GTTCAGACGTGTGCTCTTCCGATC    |
| STL-seq custom 3' indexing primer 8 | CAAGCAGAAGACGGCATAACGAGATGCGCATTAGTGACTGGA GTTCAGACGTGTGCTCTTCCGATC    |
